# Supplementary material
Source: PubMed Central journal article supplement (PMC3253239)
Supplement: NIHMS327548-supplement-Supp_Figure_S1.pdf [file NIHMS327548-supplement-Supp_Figure_S1.pdf]

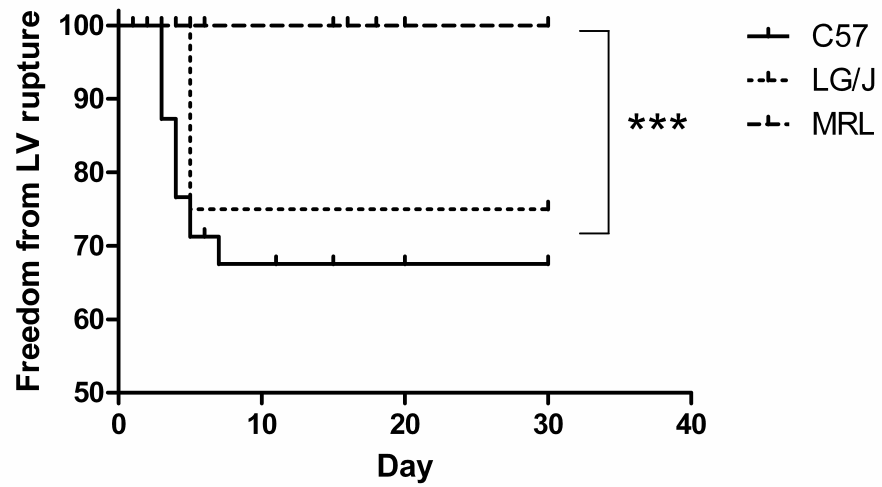

**Supplemental Figure S1.** Freedom from LV rupture in all 3 strains, calculated using Kaplan-Meier analysis. The MRL rupture rate of 0% is significantly different from the other strains (\*\*\*,  $P < 0.001$ ). C57  $n = 106$ , MRL  $n = 90$ , LG/J  $n = 31$ .
