# Supplementary material
Source: PubMed Central journal article supplement (PMC3253239)
Supplement: NIHMS327548-supplement-Supp_Figure_S2.pdf [file NIHMS327548-supplement-Supp_Figure_S2.pdf]

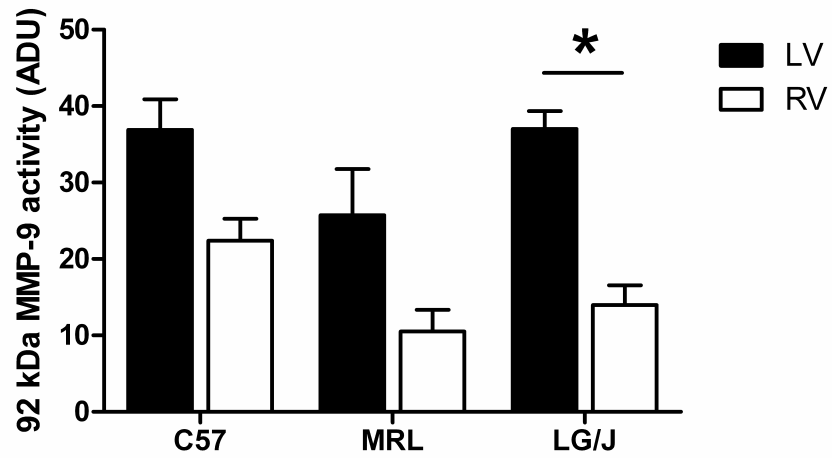

**Supplemental Figure S2.** 92 kDa MMP-9 activity was measured 3 days post-MI in C57 ( $n = 6$ ), MRL ( $n = 5$ ) and LG/J ( $n = 5$ ) LVs and RVs. MMP-9 activity was higher in the LG/J LV than the RV ( $P < 0.05$ ); all other differences were not statistically significant (Kruskal-Wallis statistic with Dunn post-tests).
